# Supplementary material
Source: PubMed Central journal article supplement (PMC4199900)

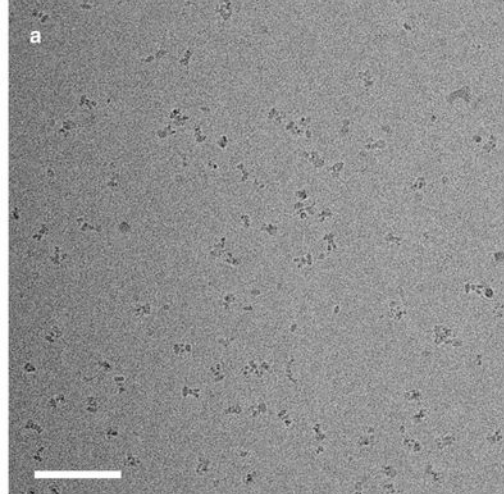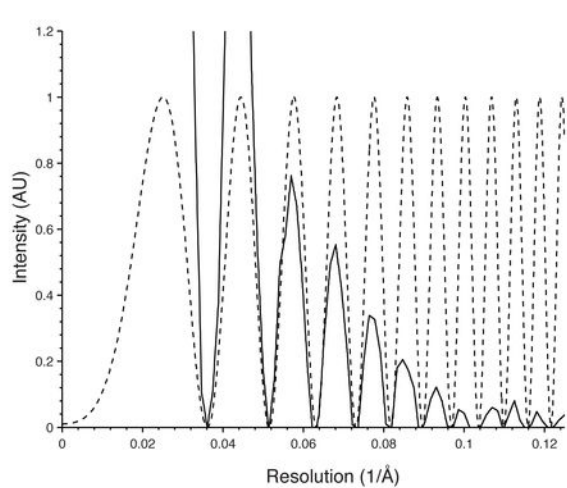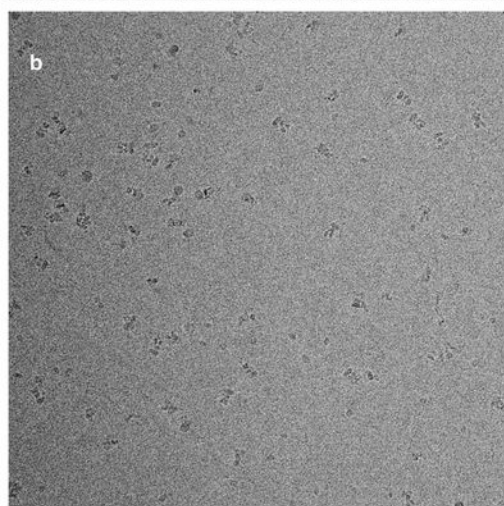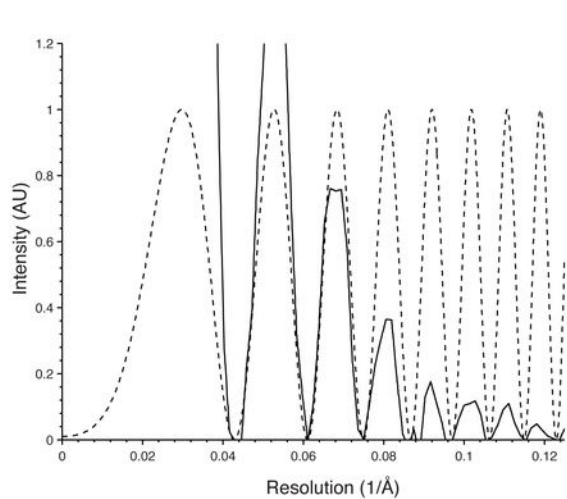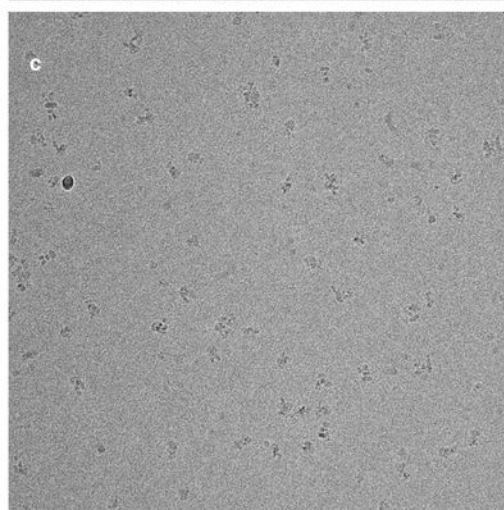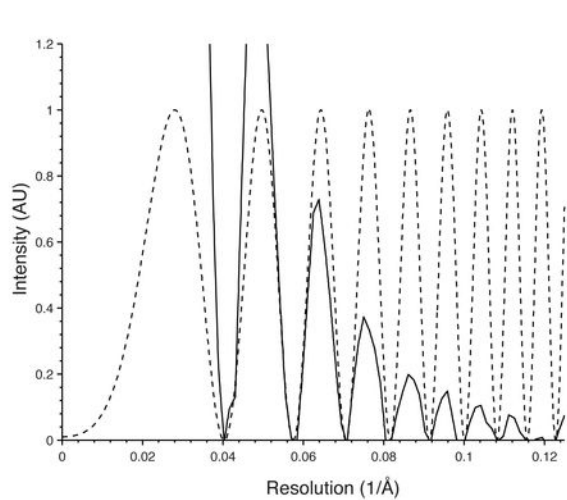

Supplement: NIHMS607459-supplement-ED_Table1.pdf [file NIHMS607459-supplement-ED_Table1.pdf]
